# Supplementary material
Source: HighWire-hosted journal article supplement (https://bjo.bmj.com/content/suppl/2007/02/12/89.10.1293)
Supplement: 89101293italiantranslation.pdf [file 89101293italiantranslation.pdf]

# Effetti di dorzolamide e timololo sul flusso ematico oculare in pazienti con glaucoma primario ad angolo aperto e ipertensione oculare

G Fuchsjäger-Mayrl, B Wally, G Rainer, W Buehl, T Aggermann, J Kolodjaschna, G Weigert, E Polska, H-G Eichler, C Vass, L Schmetterer

Br J Ophthalmol 2005;89:1293-1297. doi: 10.1136/bjo.2005.067637

**Background:** Ci sono evidenze secondo le quali le anomalie della perfusione della testa del nervo ottico sono coinvolte nella patogenesi del glaucoma. Vi è quindi un notevole interesse riguardo agli effetti dei farmaci topici antiglaucomatosi sul flusso ematico oculare. È stato intrapreso uno studio per confrontare gli effetti emodinamici oculari di dorzolamide e timololo in pazienti con glaucoma primario ad angolo aperto (GPAA) o ipertensione oculare (IO).

**Metodi:** Centoquaranta pazienti con GPAA o IO sono stati inclusi in uno studio controllato, randomizzato, in doppio cieco, in due gruppi paralleli: 70 sono stati randomizzati alla terapia con timololo e 70 con dorzolamide per un periodo di 6 mesi. I soggetti con pressione intraoculare (PIO) che non rispondeva a nessuno dei due farmaci, dopo 2 settimane sono passati al trattamento alternativo. Per misurare il flusso ematico a livello della rima neuroretinica temporale e dell'escavazione papillare del nervo ottico è stata utilizzata la flussimetria doppler a scansione laser. Il flusso ematico pulsatile coroideale è stato valutato misurando l'ampiezza delle pulsazioni del *fundus* con interferometria laser.

**Risultati:** Cinque pazienti non hanno risposto al timololo e sono passati al gruppo trattato con la dorzolamide, mentre 18 pazienti sono passati dal trattamento con dorzolamide a quello con timololo. Gli effetti di entrambi i farmaci sulla PIO e sulla pressione di perfusione oculare sono risultati comparabili. La dorzolamide, ma non il timololo, ha aumentato il flusso ematico in corrispondenza della rima neuroretinica temporale [8,5 (1,6)%,  $p < 0,001$  versus timololo] e dell'escavazione papillare del nervo ottico [13,5 (2,5)%,  $p < 0,001$  versus timololo], oltre che l'ampiezza della pulsazione del *fundus* [8,9 (1,3)%,  $p < 0,001$  versus timololo].

**Conclusioni:** Questo studio indica un aumento del flusso ematico in corrispondenza della testa del nervo ottico e della coroide dopo 6 mesi di trattamento con la dorzolamide, ma non con il timololo. Rimane da stabilire se questo effetto possa aiutare a ridurre il danno al campo visivo nei pazienti con glaucoma.

Per le affiliazioni, vedi alla fine dell'articolo

Indirizzo per la corrispondenza:  
Dr L Schmetterer,  
Department of Clinical Pharmacology, Währinger Gürtel 18-20, A-1090 Vienna, Austria; Leopold.Schmetterer@meduniwien.ac.at

Accettato per la pubblicazione il 1 aprile 2005

Vi sono crescenti evidenze che anomalie del flusso ematico oculare siano coinvolte nella patogenesi del glaucoma,<sup>1</sup> pertanto vi è un notevole interesse riguardo ai potenziali effetti emodinamici oculari dei farmaci antiglaucomatosi attualmente disponibili. Numerosi studi clinici condotti con l'intento di chiarire questo aspetto hanno utilizzato tecniche diverse per la valutazione del flusso ematico oculare, giungendo a risultati parzialmente contraddittori.<sup>2</sup> Tuttavia, molti studi pubblicati risentono dello scarso numero di pazienti inclusi.

Abbiamo confrontato gli effetti emodinamici oculari di dorzolamide e timololo in un ampio numero di pazienti con glaucoma o ipertensione oculare (IO). La scelta della dorzolamide si è basata su precedenti evidenze secondo cui il farmaco sarebbe in grado di aumentare il flusso ematico oculare,<sup>3-9</sup> sebbene non tutti gli studi abbiano evidenziato risultati positivi.<sup>10-12</sup> Il timololo è stato invece scelto come prodotto di controllo perché l'effetto ipotensivo oculare di questo  $\beta$ -antagonista è solo leggermente superiore a quello della dorzolamide<sup>13</sup> e ci si possono attendere effetti comparabili sulla pressione di perfusione oculare (PPO).

Il flusso ematico a livello della testa del nervo ottico (TNO) è stato misurato utilizzando la flussimetria doppler a scansione laser (FDSL);<sup>14</sup> il flusso ematico pulsatile coroideale è stato invece valutato misurando l'ampiezza della pulsazione del *fundus* (APF) con interferometria laser.<sup>15</sup>

## METODI

### Pazienti

Dopo l'approvazione da parte del comitato etico della *Vienna University School of Medicine*, sono stati arruolati 140 pazienti con glaucoma primario ad angolo aperto (GPAA) o IO. Per il calcolo della dimensione del campione, basato sui dati sulla riproducibilità del Heidelberg retina flowmeter (deviazione standard del 32%, calcolata su misure mensili, per 6 mesi, in pazienti con GPAA; dati non pubblicati), è stato usato un modello ANOVA a misure ripetute con un livello  $\alpha$  di 0,05 e un livello  $\beta$  di 0,2. Differenze inferiori al 10% tra i gruppi di trattamento sono state considerate clinicamente irrilevanti. Su queste basi, il calcolo della dimensione del campione ha indicato un totale di 127 soggetti. In origine si era ipotizzata una percentuale di interruzioni dello studio (*drop out*) del 20% e, di conseguenza, era stato programmato l'arruolamento di 160 pazienti. Dal momento che la percentuale di *drop out* era inferiore, sono stati inclusi solo 140 pazienti. Nel calcolo del campione non è stata considerata la variabilità della misura della pulsazione del *fundus* poiché era trascurabile.

**Abbreviazioni:** APF, ampiezza della pulsazione del *fundus*; HRF, Heidelberg retina flowmeter; PIO, pressione intraoculare; IO, ipertensione oculare; TNO, testa del nervo ottico; PPO, pressione di perfusione oculare; GPAA, glaucoma primario ad angolo aperto; FDSL, flussimetria Doppler a scansione laser

Le caratteristiche basali dei pazienti sono state riportate in dettaglio in una pubblicazione precedente.<sup>16</sup> I criteri di inclusione comprendevano: GPAA o IO con una pressione intraoculare (PIO) non trattata  $\geq 21$  mmHg almeno in un occhio, documentata almeno in tre diverse occasioni. Per tutti i pazienti è stato previsto un periodo di *washout* di 2 settimane dai precedenti trattamenti antiglaucosomati. I seguenti criteri escludevano i soggetti dalla partecipazione al *trial*: glaucoma esfoliativo; glaucoma pigmentario; anamnesi positiva per chiusura d'angolo acuta; *mean deviation* (MD) dell'esame del campo visivo (programma Humphrey 30-2)  $> 12$ ; chirurgia intraoculare o trabeculoplastica con laser ad argon negli ultimi 6 mesi; infiammazione o infezione oculari negli ultimi 3 mesi; bradicardia (frequenza cardiaca  $< 50$  battiti/minuto); blocco cardiaco di secondo e terzo grado; asma bronchiale; broncopneumopatia cronica ostruttiva; scompenso cardiaco congestizio; grave insufficienza renale (*clearance* della creatinina  $< 1,8$  L/h); anamnesi di ipersensibilità a uno dei farmaci in studio o a farmaci chimicamente simili; anamnesi di mancata riduzione della PIO con  $\beta$ -bloccanti o inibitori dell'anidasi carbonica (*carbonic anhydrase inhibitors*, CAI) topici; gravidanza.

La differenziazione tra i pazienti con GPAA e IO si è basata sui criteri dell'*Ocular Hypertension Treatment Study*.<sup>17</sup> Un campo visivo anormale era quindi definito come *glaucoma hemifield test* (GHT) al di fuori dei limiti di normalità e/o una PSD (*pattern standard deviation*) corretta con  $p < 0,05$ .

### Protocollo

Lo studio è stato condotto secondo un disegno randomizzato, in doppio cieco, a gruppi paralleli. I pazienti sono stati trattati con il timololo due volte al giorno o con la dorzolamide tre volte al giorno, per 6 settimane. Per garantire il doppio cieco, ai pazienti del gruppo timololo è stata fornita un flacone di placebo, identico nell'aspetto, per l'instillazione dell'ora di pranzo. Lo schema di conduzione dello studio è riportato nella fig 1. Nelle 2 settimane precedenti l'inizio dello studio, i pazienti sono stati valutati per l'eleggibilità ed esaminati secondo quanto descritto sopra. Se almeno un occhio corrispondeva ai criteri di inclusione, veniva programmata la visita iniziale (basale). Quando possibile, entrambi gli occhi sono stati trattati con il farmaco in studio. In caso contrario, l'occhio controlaterale è stato trattato secondo le esigenze cliniche. Alla visita basale, tutti i parametri di valutazione sono stati determinati tra le ore 08:00 e le 12:00.

Ai pazienti è stato chiesto di ritornare 2 settimane dopo la visita basale. Durante questa seconda visita i pazienti sono stati suddivisi in *responders* e *non-responders*. I *responders*, definiti come pazienti con una PIO  $\leq 19$  mmHg o una diminuzione della PIO rispetto al basale  $\geq 25\%$  nell'occhio di riferimento, hanno continuato il trattamento come

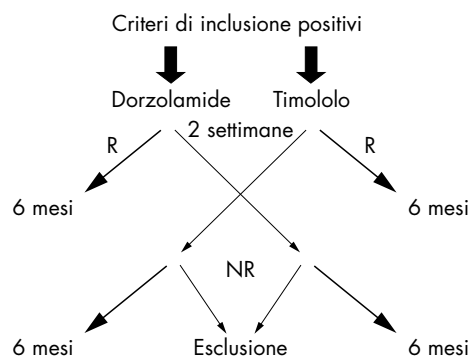

**Figura 1** Schema dello studio (R = soggetti PIO responders; NR = soggetti PIO non-responders).

programmato. I *non-responders* o i pazienti che non avevano tollerato il farmaco in studio sono passati al trattamento alternativo ed è stata fissata loro un'altra visita, 2 settimane più tardi. Alla visita svoltasi 2 settimane dopo la variazione del trattamento questi pazienti sono stati ulteriormente suddivisi in *responders* e *non-responders*. I *non-responders* a entrambi i trattamenti sono usciti dallo studio. I pazienti che hanno risposto al secondo farmaco antiglaucosomato hanno continuato lo studio come programmato.

Ulteriori visite erano previste 3 e 6 mesi dopo quella basale. In tali occasioni sono state valutate tutte le variabili emodinamiche e la PIO. Un test del campo visivo e un esame oftalmico sono stati effettuati nuovamente all'ultima visita. Sono state accettate una deviazione di  $\pm 3$  giorni per la visita dopo 2 settimane e di  $\pm 1$  settimana per le altre visite.

Gli studi sono stati condotti presso il Department of Clinical Pharmacology e il Department of Ophthalmology, dell'Allgemeines Krankenhaus di Vienna.

### Misure

#### Flussimetria Doppler a scansione laser (FDSL)

La FDSL è stata condotta utilizzando il flussimetro retinico di Heidelberg (HRF; Heidelberg Engineering, Heidelberg, Germania). L'HRF è un oftalmoscopio confocale a scansione laser che applica i principi della FDSL. Lo strumento calcola la velocità media dei globuli rossi, il volume e il flusso ematico, calcolati in unità relative per ciascun punto dell'immagine.<sup>18</sup> Nel presente studio, per calcolare i parametri emodinamici, sono state scelte un'area di  $10 \times 10$  pixel ( $100 \times 100 \mu\text{m}$ ) nell'escavazione (*cup*) del disco ottico (CupBF) e un'area di  $20 \times 20$  pixel ( $200 \times 200 \mu\text{m}$ ) sulla rima (*rim*) temporale neuroretinica (RimBF). La selezione delle aree dove effettuare le misure si è basata sul metodo descritto da Nicolela *et al.*<sup>19</sup> La rima neuroretinica è stata misurata da immagini focalizzate sulla retina superficiale e l'escavazione papillare da immagini focalizzate sulla lamina cribrosa. Le misure sono state eseguite in zone senza vasi maggiori superficiali.

La riproducibilità è una questione critica con la FDSL.<sup>20-21</sup> Sono state eseguite, quindi, almeno due registrazioni ed è stata calcolata la media dei due valori delle migliori immagini ottenute. Nell'analisi sono state incluse solo le letture di flusso con un coefficiente di variazione inferiore al 20%.

#### Misure della pulsazione del *fundus* mediante interferometria laser

Le pulsazioni del *fundus* oculare, sincrone col polso, sono state valutate mediante interferometria laser, secondo i metodi descritti in dettaglio da Schmetterer *et al.*<sup>15</sup> L'occhio è illuminato da un raggio laser che viene riflesso sia dalla superficie anteriore della cornea sia dal *fundus*. Le due onde rimesse producono frange di interferenza dalle quali è possibile calcolare quali sono i cambiamenti di distanza tra cornea e retina durante un ciclo cardiaco. Il massimo cambiamento di distanza viene definito ampiezza della pulsazione del *fundus* (APF) e stima il flusso ematico pulsatile coroideale.<sup>22-23</sup> Anche in questo caso, sono state effettuate due misure ed è stata calcolata la media. I valori di APF con un coefficiente di variazione superiore al 20% non sono stati inclusi nell'analisi.

#### Esame del campo visivo

L'esame del campo visivo è stato condotto mediante Humphrey Field Analyser (*Full Threshold Program 30-2*). Tutti i pazienti avevano esperienza nel test, avendolo eseguito almeno 3 volte, di cui una volta nei 3 mesi precedenti l'inizio dello studio. Tutte le misurazioni hanno avuto la supervisione di un tecnico esperto. I criteri di eleggibilità per il campo

**Tabella 1** Caratteristiche della popolazione in studio

|                           | <b>GPAA<br/>(n = 49)</b> | <b>IO<br/>(n = 91)</b>  |
|---------------------------|--------------------------|-------------------------|
| Età (anni)                | 63,0 (13,5)              | 61,2 (13,3)             |
| Sesso (M/F)               | 19/30                    | 48/43                   |
| PIO (mmHg)                | 22,6 (2,9)               | 23,2 (3,8)              |
| PAS (mmHg)                | 141,0 (15,8)             | 142,8 (17,8)            |
| PAD (mmHg)                | 75,7 (10,1)              | 74,8 (11,9)             |
| PPO (mmHg)                | 39,0 (7,2)               | 40,6 (9,0)              |
| Frequenza cardiaca (/min) | 78,1 (12,5)              | 78,0 (11,6)             |
| Deviazione media          | -1,58 (-11,09-<br>+2,83) | -0,16 (-5,35-<br>+4,10) |
| Rapporto verticale C/D    | 0,75 (0,11)              | 0,59 (0,12)             |
| Rapporto orizzontale C/D  | 0,77 (0,11)              | 0,62 (0,11)             |
| Area del disco ottico     | 1,58 (0,37)              | 1,46 (0,34)             |
| RimBF (au)                | 287 (51)                 | 333 (111)               |
| CupBF (au)                | 192 (71)                 | 212 (101)               |
| APF ( $\mu$ m)            | 3,0 (0,8)                | 3,3 (0,9)               |

PIO, pressione intraoculare; PAS, pressione sistolica; PAD, pressione diastolica; PPO, pressione di perfusione oculare; rapporto C/D, rapporto escavazione papillare/disco; RimBF, flusso ematico a livello della rima; CupBF, flusso ematico a livello dell'escavazione papillare; APF, ampiezza della pulsazione del fundus. I dati sono presentati come valore medio (DS) tranne che per la deviazione media che è riportata come valore mediano (range).

visivo erano: meno del 33% di falsi positivi, meno del 33% di falsi negativi e meno del 33% di perdita di fissazione.

#### Misura non invasiva dei parametri emodinamici sistemici

La pressione arteriosa sistolica (PAS) e diastolica (PAD) sono state misurate al braccio con uno strumento automatico oscillometrico; la pressione arteriosa media (PAM) è stata calcolata come  $1/3$  PAS +  $2/3$  PAD. La frequenza cardiaca è stata registrata automaticamente mediante un dispositivo applicato al dito del paziente (HP-CMS patient monitor, Hewlett

Packard, Palo Alto, CA, USA). La pressione di perfusione oculare (PPO) è stata calcolata come  $2/3 * PAM - PIO$ .

#### Analisi dei dati

Per confrontare gli effetti della dorzolamide e del timololo è stato usato un modello ANOVA a due vie per misure ripetute. I pazienti che si sono presentati solo alla visita basale non sono stati inclusi nell'analisi. Per quanto riguarda i pazienti che non hanno completato lo studio ma hanno effettuato almeno la visita dopo 2 settimane, l'analisi è stata condotta secondo l'approccio LOCF (*last observation carried forward*). I dati dell'ultima visita effettivamente effettuata sono stati quindi utilizzati per tutti i successivi dati mancanti. Nei pazienti che non hanno risposto al farmaco assegnato alla randomizzazione e sono passati al trattamento alternativo, i valori pretrattamento sono stati considerati come basale. In questi casi i valori stimati alla visita della settimana 2 non sono stati inclusi nell'analisi. Inoltre, è stato applicato un modello di analisi della regressione multipla, utilizzando l'inclusione graduale di variabili predittive (per l'ordine di inclusione vedi la tabella 3) per caratterizzare potenziali fattori di variazioni nei parametri del flusso ematico, indotte dalla dorzolamide e dal timololo, rispetto al basale. I dati sono presentati come valori medi (DS). Il livello di significatività è stato fissato a un valore di  $p = 0,05$ .

#### RISULTATI

Le caratteristiche basali della popolazione in studio sono state presentate in una precedente pubblicazione<sup>16</sup> e sono sintetizzate nella tabella 1. Tre pazienti si sono presentati solo alla visita basale e non sono stati inclusi nell'analisi. Cinque pazienti non hanno risposto al timololo e sono passati al gruppo trattato con la dorzolamide dopo le prime 2 settimane di trattamento. Diciotto pazienti non hanno mostrato una risposta adeguata della PIO alla dorzolamide o non hanno

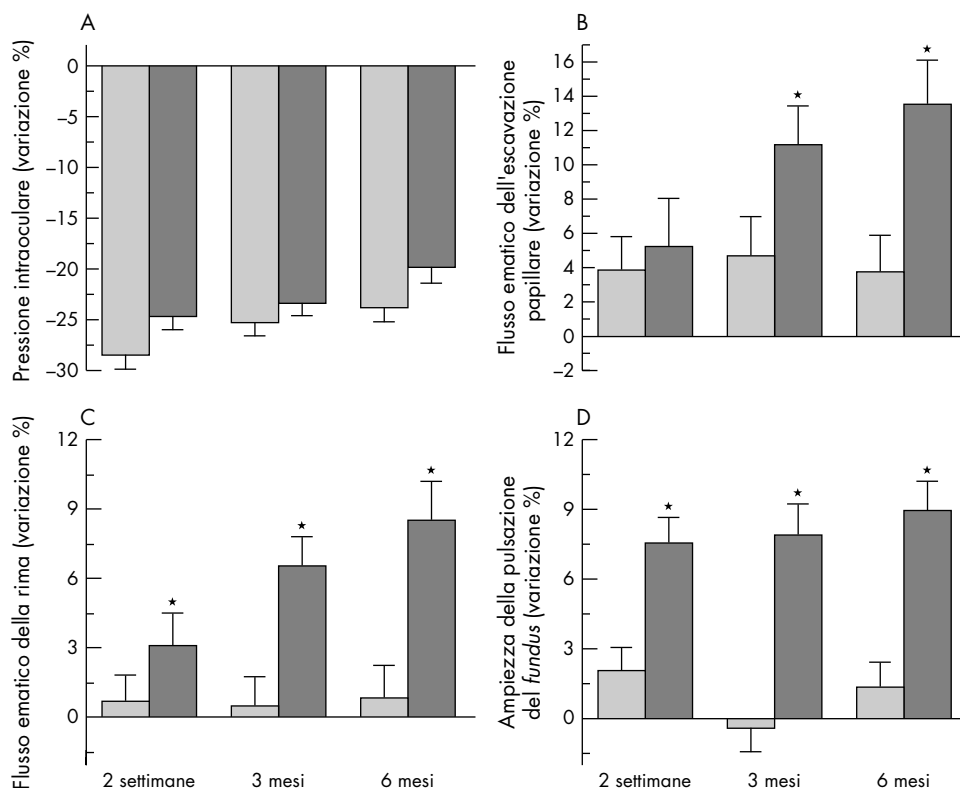

**Figura 2** Effetti di dorzolamide (barre scure) e timololo (barre chiare) su (A) pressione intraoculare, (B) flusso ematico a livello di escavazione papillare, (C) flusso ematico a livello della rima e (D) ampiezza della pulsazione del fundus. I dati sono presentati come valore medio (DS). Gli asterischi indicano gli effetti significativi di dorzolamide rispetto a timololo.

**Tabella 2** Effetti di dorzolamide e timololo sulla pressione arteriosa e sulla frequenza cardiaca

|                           | Basale       | 2 settimane  | 3 mesi       | 6 mesi       |
|---------------------------|--------------|--------------|--------------|--------------|
| <b>Timololo</b>           |              |              |              |              |
| PAS (mmHg)                | 142,1 (16,5) | 140,7 (19,2) | 137,4 (20,7) | 134,3 (24,1) |
| PAD (mmHg)                | 75,3 (9,5)   | 73,6 (9,9)   | 73,0 (10,3)  | 75,6 (11,7)  |
| PPO (mmHg)                | 39,3 (7,4)   | 41,3 (7,6)   | 40,0 (6,3)   | 41,0 (8,3)   |
| Frequenza cardiaca (/min) | 76,8 (12,0)  | 75,9 (12,0)  | 73,4 (11,8)  | 73,4 (11,7)  |
| <b>Dorzolamide</b>        |              |              |              |              |
| PAS (mmHg)                | 142,3 (18,1) | 140,7 (21,4) | 136,8 (19,5) | 138,1 (17,9) |
| PAD (mmHg)                | 75,0 (13,7)  | 75,6 (12,4)  | 72,8 (11,6)  | 71,4 (11,8)  |
| PPO (mmHg)                | 39,0 (8,6)   | 41,8 (9,3)   | 40,6 (8,4)   | 39,4 (8,3)   |
| Frequenza cardiaca (/min) | 79,9 (12,0)  | 82,1 (13,3)  | 81,2 (12,9)  | 79,2 (13,4)  |

PAS, pressione arteriosa sistolica; PAD, pressione arteriosa diastolica; PPO, pressione di perfusione oculare. I dati sono presentati come valore medio (DS).

tolerato il trattamento e sono passati al gruppo trattato con il timololo. L'incidenza di insuccessi per controllo inadeguato della PIO o per reazioni avverse è stata significativamente più alta nel gruppo trattato con la dorzolamide rispetto al gruppo trattato con il timololo ( $p < 0,001$ ). Dopo il passaggio al trattamento alternativo tutti i pazienti hanno fatto registrare un controllo soddisfacente della PIO e nessun altro paziente ha dovuto essere escluso in questa fase dello studio. Dopo le visite a 2 settimane e a 3 mesi, rispettivamente sette e cinque pazienti non si sono presentati al *follow up*. Per i dati di questi 12 soggetti è stato applicato l'approccio LOCF. I farmaci in studio non hanno avuto influenza sulla pressione arteriosa né sulla frequenza cardiaca (PAS:  $p = 0,823$  tra i gruppi; PAD:  $p = 0,644$  tra i gruppi; frequenza cardiaca:  $p = 0,511$  tra i gruppi; tabella 2). I valori di PIO al basale erano simili nei due gruppi di trattamento [timololo: 23,0 (3,1) mmHg; dorzolamide: 22,8 (3,3) mmHg]. La riduzione della PIO è risultata simile nei due gruppi ( $p = 0,32$ , fig 2). Alla visita a 6 mesi, la riduzione della PIO è stata pari al 23,8 (1,4)% con il timololo e al 19,9 (1,6)% con la dorzolamide. Conseguentemente, la PPO tendeva ad aumentare in misura analoga nei due gruppi ( $p = 0,912$  tra i gruppi; tabella 2). Tutti i parametri emodinamici oculari sono aumentati durante il trattamento con dorzolamide, mentre non si sono modificate durante il trattamento con il timololo (fig 2). Questa differenza è risultata significativa per CupBF ( $p < 0,001$ ), RimBF ( $p < 0,001$ ) e APF ( $p < 0,001$ ). Dopo 6 mesi di trattamento, CupBF è aumentato del 13,5 (2,5)%, RimBF dell'8,5 (1,6)% e APF dell'8,9 (1,3)% dopo trattamento con la dorzolamide, mentre nessun effetto è stato osservato con il timololo.

I risultati dell'analisi di regressione multipla sono riportati nella tabella 3. L'aumento nei parametri emodinamici oculari durante il trattamento con la dorzolamide è stato indipendente dalla diminuzione della PIO e dal suo valore

basale. Inoltre, l'aumento è risultato simile nei pazienti con GPAA e IO e non influenzato da alcuna variabile misurata. Dopo 6 mesi di trattamento con il timololo o la dorzolamide, i parametri del campo visivo erano invariati (dati non riportati).

## DISCUSSIONE

Questo studio indica che il trattamento per 6 mesi con la dorzolamide, ma non con il timololo, si associa ad un aumento del flusso ematico oculare. Ciò è stato dimostrato utilizzando due metodi indipendenti per la valutazione dei parametri emodinamici oculari. Numerosi argomenti indicano che questo risultato è dovuto a un effetto vasodilatatore diretto della dorzolamide e non è secondario alla diminuzione della PIO. Da una parte la dorzolamide e il timololo hanno indotto una diminuzione della PIO e un aumento della PPO simili, mentre gli effetti emodinamici oculari sono stati osservati solo con la dorzolamide, dall'altra i risultati dell'analisi di regressione multipla indicano che l'aumento della PPO è indipendente dalla riduzione della PIO.

L'importanza dei nostri risultati per il trattamento del glaucoma dipende dal fatto che in questa patologia un ridotto flusso ematico della TNO possa contribuire alla perdita di cellule gangliari retiniche. Molti studi hanno dimostrato che il flusso ematico nella TNO è ridotto nei pazienti con glaucoma,<sup>19 24-27</sup> ma studi trasversali non forniscono un legame tra ridotta perfusione e progressione della malattia. Negli ultimi anni, tuttavia, ci sono crescenti evidenze che un ridotto flusso ematico oculare sia direttamente associato con la perdita del campo visivo. In uno studio longitudinale in pazienti con glaucoma a pressione normale, una diminuita velocità di flusso ematico nei vasi retrobulbari è stata associata alla progressione della perdita del campo visivo.<sup>28</sup> Ciò è in accordo con un recente studio retrospettivo, nel quale

**Tabella 3** Analisi di regressione multipla tra le variazioni dei parametri emodinamici oculari indotte da dorzolamide e gli altri parametri valutati (sono riportati i valori di p)

|                                      | RimBF | CupBF | APF  |
|--------------------------------------|-------|-------|------|
| GPAA/ipertensione                    | 0,52  | 0,60  | 0,59 |
| Variazione % della PPO (dopo 6 mesi) | 0,28  | 0,40  | 0,25 |
| Variazione % della PIO (dopo 6 mesi) | 0,20  | 0,60  | 0,23 |
| PPO                                  | 0,67  | 0,56  | 0,69 |
| Pressione intraoculare               | 0,61  | 0,78  | 0,33 |
| Deviazione media                     | 0,79  | 0,72  | 0,71 |
| Età                                  | 0,42  | 0,49  | 0,64 |
| PAS                                  | 0,66  | 0,56  | 0,73 |
| PAD                                  | 0,82  | 0,72  | 0,84 |
| Frequenza cardiaca                   | 0,88  | 0,83  | 0,76 |

RimBF, flusso ematico a livello della rima; CupBF, flusso ematico a livello dell'escavazione papillare; APF, ampiezza della pulsazione del *fundus*; PPO, pressione di perfusione oculare; PIO, pressione intraoculare; PAS, pressione arteriosa sistolica; PAD, pressione arteriosa diastolica.

la velocità di progressione del deficit del campo visivo è stata correlata alle ridotte velocità di flusso ematico retrobulbare, indipendentemente dal deficit di campo visivo e dalla PIO pre-esistenti.<sup>29</sup> Uno studio longitudinale con un *follow up* medio di 33 mesi ha recentemente riportato una significativa correlazione tra il volume ematico nella TNO, valutato mediante FDSL, e la perdita del campo visivo nel GPAA.<sup>30</sup> Inoltre, numerosi studi indicano che il glaucoma non è solo correlato al ridotto flusso ematico nella TNO, ma anche a un'alterata regolazione del flusso oculare: questo fatto non è facilmente spiegabile con una riduzione secondaria del flusso ematico. L'analisi del flusso ematico basale nel presente studio ha dimostrato che esiste un'associazione anomala tra RIMBF, CupBF e APF, e la pressione arteriosa sistemica, che non si osserva invece nei controlli sani di età corrispondente.<sup>16</sup> Anche se questi *trials* non stabiliscono un'evidenza diretta di un effetto benefico del trattamento sull'aumento del flusso ematico nella TNO in pazienti con GPAA, essi forniscono un forte razionale per caratterizzare i farmaci antiglaucososi come dotati di proprietà ipotensive e vasodilatatrici a livello oculare.

L'esatto meccanismo sotteso agli effetti vasodilatatori dei CAI nei vasi oculari non è definito. In retine di ratto in coltura, i CAI hanno provocato la diminuzione del pH nello spazio extracellulare e il suo aumento nello spazio intracellulare, fenomeni correlati a un aumento del diametro dei capillari retinici e al rilassamento dei periciti retinici.<sup>31</sup> Somministrata per via endovenosa, la dorzolamide induce acidosi del sangue arterioso<sup>32</sup> e dello spazio extracellulare sopra la TNO.<sup>33</sup> Esperimenti in arterie retiniche isolate di bovino, precontratte, indicano che gli effetti vasodilatatori della dorzolamide sono indipendenti dalla variazione di pH perché la dilatazione indotta dalla dorzolamide si osserva anche quando il pH viene mantenuto costante.<sup>34</sup> L'attivazione dell'ossido nitrico non sembra svolgere un ruolo importante nella vasodilatazione oculare indotta da CAI;<sup>35</sup> saranno necessari ulteriori studi per capire i meccanismi che determinano gli effetti vascolari dei CAI.

Un'osservazione interessante desumibile dal presente studio è che tutti i parametri emodinamici oculari sono rimasti virtualmente immutati dopo trattamento con il timololo. Precedenti segnalazioni sugli effetti emodinamici oculari del timololo sono contraddittori: ciò può essere attribuibile ai differenti regimi di trattamento, a problemi correlati al metodo e alla mancanza di un disegno sperimentale adeguato.<sup>36-41</sup> I nostri risultati indicano, tuttavia, che la somministrazione topica a lungo termine del timololo non si associa a rilevanti effetti oculari emodinamici.

Entrambe le tecniche utilizzate per la valutazione dell'emodinamica oculare presentano dei limiti. Con l'HRF non è nota la profondità del campionamento nel tessuto della TNO. Inoltre, con questa tecnica la riproducibilità è un problema,<sup>19, 20</sup> più grave nei pazienti con glaucoma rispetto ai soggetti sani di controllo, determinando la necessità di ampie dimensioni del campione per il confronto. È ovvio che la misura APF valuti solo la porzione pulsatile del flusso ematico coroideale. Di conseguenza, con questa tecnica qualunque conclusione sugli effetti farmacodinamici dipende in modo critico dall'assunto che il rapporto tra flusso ematico pulsatile e non-pulsatile sia costante. Nel presente studio sono stati ottenuti risultati concordi con le due tecniche, che indicano come gli effetti osservati non siano influenzati in misura significativa dai limiti di tali tecniche.<sup>42</sup>

In conclusione, i dati qui presentati indicano che la dorzolamide, ma non il timololo, aumenta il flusso ematico coroideale e della TNO in pazienti con GPAA o IO. Resta da dimostrare se, in pazienti con glaucoma, questo effetto sia associato con la conservazione del campo visivo.

## RINGRAZIAMENTI

Gli autori ringraziano i seguenti oculisti per aver inviato i loro pazienti alla nostra unità affinché fossero inclusi nel presente studio: Dr Elisabeth Arock-Mettinger, Dr Helga Azem, Dr Alexandra Crammer, Dr Paul Drobec, Dr Marcela Hakl, Dr Christine Hönigsman, Dr Hans Kössler, Dr Eva Krammer, Dr Constanze Merenda, Dr Maria Reichel, Dr Günther Reichelt, Dr Karin Schmetterer, Dr Herbert Schuster, Dr Naresh Sheetal, Dr Elisabeth Sienko, Dr Eva Weingessl.

## Affiliazioni degli autori

**G Fuchsjaeger-Mayrl, B Wally, T Aggermann, J Kolodjaschna, G Weigert, E Polska, H-G Eichler, L Schmetterer**, Department of Clinical Pharmacology, Medical University of Vienna, Austria  
**G Fuchsjaeger-Mayrl, G Rainer, W Buehl, C Vass**, Department of Ophthalmology, Medical University of Vienna, Austria  
**L Schmetterer**, Institute of Medical Physics, Medical University of Vienna, Austria

Si ringrazia Merck, Sharpe and Dohme per il supporto finanziario sotto forma di *grant* senza restrizioni.

## BIBLIOGRAFIA

- 1 **Flammer J**, Orgul S, Costa VP, et al. The impact of ocular blood flow in glaucoma. *Prog Retin Eye Res* 2002;**21**:359-93.
- 2 **Harris A**, Jonescu-Cuyppers CP. The impact of glaucoma medication on parameters of ocular perfusion. *Curr Opin Ophthalmol* 2001;**12**:131-7.
- 3 **Harris A**, Arend O, Arend S, et al. Effects of topical dorzolamide on retinal and retrobulbar hemodynamics. *Acta Ophthalmol Scand* 1996;**74**:569-72.
- 4 **Martinez A**, Gonzalez F, Capeans C, et al. Dorzolamide effect on ocular blood flow. *Invest Ophthalmol Vis Sci* 1999;**40**:1270-5.
- 5 **Harris A**, Arend O, Kagemann L, et al. Dorzolamide, visual function and ocular hemodynamics in normal-tension glaucoma. *J Ocul Pharmacol Ther* 1999;**15**:189-97.
- 6 **Harris A**, Arend O, Chung HS, et al. A comparative study of betaxolol and dorzolamide effect on ocular circulation in normal-tension glaucoma patients. *Ophthalmology* 2000;**107**:430-4.
- 7 **Harris A**, Jonescu-Cuyppers CP, Kagemann L, et al. Effect of dorzolamide timolol combination versus timolol 0.5% on ocular blood flow in patients with primary open-angle glaucoma. *Am J Ophthalmol* 2001;**132**:490-5.
- 8 **Avunduk AM**, Sari A, Akyol N, et al. The one-month effects of topical betaxolol, dorzolamide and apraclonidine on ocular blood flow velocities in patients with newly diagnosed primary open-angle glaucoma. *Ophthalmologica* 2001;**215**:361-5.
- 9 **Bernd AS**, Pillunat LE, Bohm AG, et al. Okuläre Hämodynamik und Gesichtsfeld beim Glaukom unter Dorzolamid-Therapie. *Ophthalmologie* 2001;**98**:451-5.
- 10 **Grunwald JE**, Mathur S, DuPont J. Effects of dorzolamide hydrochloride 2% on the retinal circulation. *Acta Ophthalmol* 1997;**75**:236-8.
- 11 **Pillunat LE**, Bohm AG, Koller AU, et al. Effect of topical dorzolamide on optic nerve head blood flow. *Graefes Arch Clin Exp Ophthalmol* 1999;**237**:495-500.
- 12 **Bergstrand IC**, Heijl A, Harris A. Dorzolamide and ocular blood flow in previously untreated glaucoma patients: a controlled double-masked study. *Acta Ophthalmol Scand* 2002;**80**:176-82.
- 13 **Balfour JA**, Wilde MI. Dorzolamide. A review of its pharmacology and therapeutic potential in the management of glaucoma and ocular hypertension. *Drugs Aging* 1997;**10**:384-403.
- 14 **Michelson G**, Schmauss B, Langhans MJ, et al. Principle, validity, and reliability of scanning laser Doppler flowmetry. *J Glaucoma* 1996;**5**:99-105.
- 15 **Schmetterer L**, Lexer F, Unfried C, et al. Topical measurement of fundus pulsations. *Opt Eng* 1995;**34**:711-6.
- 16 **Fuchsjaeger-Mayrl G**, Wally B, Georgopoulos M, et al. Ocular blood flow and systemic blood pressure in patients with primary open-angle glaucoma and ocular hypertension. *Invest Ophthalmol Vis Sci* 2004;**45**:834-9.
- 17 **Keltner JL**, Johnson CA, Cello KF, et al. Classification of visual field abnormalities in the ocular hypertension treatment study. *Arch Ophthalmol* 2003;**121**:643-50.
- 18 **Bonner R**, Nossal R. Principles of laser-Doppler flowmetry in laser-Doppler blood flowmetry. In: Shepard AP, Öberg AP, eds. *Developments in cardiovascular medicine*. Volume 107. Boston: Kluwer Academic Publishers, 1990:17-45.
- 19 **Nicolela MT**, Hnik P, Drance SM. Scanning laser Doppler flowmetry study on retinal and optic disc blood flow in glaucomatous patients. *Am J Ophthalmol* 1996;**122**:775-83.
- 20 **Strenn K**, Menapace R, Rainer G, et al. Reproducibility and sensitivity of scanning laser Doppler flowmetry during graded changes in pO<sub>2</sub>. *Br J Ophthalmol* 1997;**81**:360-4.
- 21 **Nicolela MT**, Hnik P, Schulzer M, et al. Reproducibility of retinal and optic nerve head blood flow measurements with laser Doppler flowmetry. *J Glaucoma* 1997;**6**:157-64.
- 22 **Schmetterer L**, Dallinger S, Findl O, et al. A comparison between laser interferometric measurement of fundus pulsation and pneumotonometric measurement of pulsatile ocular blood flow. 1. Baseline considerations. *Eye* 2000;**14**:39-45.
- 23 **Schmetterer L**, Dallinger S, Findl O, et al. A comparison between laser interferometric measurement of fundus pulsation and pneumotonometric measurement of pulsatile ocular blood flow. 2. Effects of changes in pCO<sub>2</sub> and pO<sub>2</sub> and of isoproterenol. *Eye* 2000;**14**:46-52.

- 24 **Grunwald JE**, Piltz J, Hariprasad SM, et al. Optic nerve and choroidal circulation in glaucoma. *Invest Ophthalmol Vis Sci* 1998;**39**:2329–36.
- 25 **Kerr J**, Nelson P, O'Brien C. A comparison of ocular blood flow in untreated primary open-angle glaucoma and ocular hypertension. *Am J Ophthalmol* 1998;**126**:42–51.
- 26 **Michelson G**, Langhans MJ, Groh MJ. Perfusion of the juxtapapillary retina and the neuroretinal rim area in primary open angle glaucoma. *J Glaucoma* 1996;**5**:91–8.
- 27 **Findl O**, Rainer G, Dallinger S, et al. Assessment of optic disc blood flow in patients with open angle glaucoma. *Am J Ophthalmol* 2000;**130**:589–96.
- 28 **Yamaaki Y**, Drance SM. The relationship between progression of visual field defects and retrobulbar circulation in patients with glaucoma. *Am J Ophthalmol* 1997;**124**:287–95.
- 29 **Saltimis M**, Orgul S, Doubler B, et al. Rate of progression of glaucoma correlates with retrobulbar circulation and intraocular pressure. *Am J Ophthalmol* 2003;**135**:664–9.
- 30 **Zink JM**, Grunwald JE, Piltz-Seymour J, et al. Association between lower optic nerve laser Doppler blood volume measurements and glaucomatous visual field progression. *Br J Ophthalmol* 2003;**87**:487–91.
- 31 **Reber F**, Gersch U, Funk RW. Blockers of carbonic anhydrase can cause increase of retinal capillary diameter, decrease of extracellular and increase of intracellular pH in rat retinal organ culture. *Graefes Arch Clin Exp Ophthalmol* 2003;**241**:140–8.
- 32 **Stefansson E**, Jensen PK, Eysteinnsson T, et al. Optic nerve oxygen tension in pigs and the effect of carbonic anhydrase inhibitors. *Invest Ophthalmol Vis Sci* 1999;**40**:2756–61.
- 33 **Pedersen DB**, Eysteinnsson T, Kiilgaard JF, et al. The effect of intravenous administration of carbonic anhydrase inhibitors and NH<sub>4</sub>Cl on pre-optic pH. *Invest Ophthalmol Vis Sci* 2001;**42**: ARVO abstract, 4449.
- 34 **Josefsson A**, Sigurdsson SB, Bang K, et al. Dorzolamide induces vasodilatation in isolated pre-contracted bovine retina arteries. *Exp Eye Res* 2004;**78**:215–21.
- 35 **Kiss B**, Dallinger S, Findl O, et al. Acetazolamide-induced cerebral and ocular vasodilation in man is independent of nitric oxide. *Am J Physiol* 1999;**276**:R1661–7.
- 36 **Grunwald JE**. Effect of topical timolol on the human retinal circulation. *Invest Ophthalmol Vis Sci* 1986;**27**:1713–8.
- 37 **Boles Carenini B**, Brogliatti B, Boles Carenini A. Pulsatile ocular blood flow and antiglaucomatous drugs. *New Trends Ophthalmol* 1992;**7**:195–200.
- 38 **Boles Carenini A**, Sibour G, Boles Carenini B. Differences in long term effect of timolol and betaxolol on the pulsatile ocular blood flow. *Surv Ophthalmol* 1994;**38**(Suppl):S118–24.
- 39 **Yoshida A**, Feke GT, Ogasawara H, et al. Effect of timolol on human retinal, choroidal and optic nerve head circulation. *Ophthalmic Res* 1991;**23**:162–70.
- 40 **Harris A**, Spaeth GL, Sergott RC, et al. Retrobulbar arterial hemodynamic effects of betaxolol and timolol in normal-tension glaucoma. *Am J Ophthalmol* 1995;**20**:168–75.
- 41 **Schmetterer L**, Strenn K, Findl O, et al. Effects of antiglaucoma drugs on ocular hemodynamics in healthy volunteers. *Clin Pharmacol Ther* 1997;**61**:583–95.
- 42 **Polska E**, Polak K, Luksch A, et al. Twelve hour reproducibility of choroidal blood flow parameters in healthy subjects. *Br J Ophthalmol* 2004;**88**:533–7.

Questa pubblicazione viene offerta alla Classe Medica in qualità di Servizio Scientifico della Merck Sharp & Dohme.

I punti di vista espressi in questa pubblicazione riflettono l'esperienza e le opinioni degli Autori e non necessariamente quelli della Merck Sharp & Dohme. Prima della prescrizione di qualsiasi prodotto citato nella presente pubblicazione, consultare la Scheda Tecnica fornita dalla ditta produttrice.
